# Supplementary material for: Sensor material based on occluded trisulfur anionic radicals for convenient detection of trace amounts of water molecules
Source: Royal Society of Chemistry journal article supplement (doi:10.1039/b925233a), 2010-01-01
Supplement: b925233a.pdf [file b925233a.pdf]

## Electronic Supplementary Information

### Sensor Material Based on Occluded Trisulfur Anionic Radicals for convenient Detection of Trace Amounts of Water Molecules

Qian Gao,<sup>a,b</sup> Yang Xiu,<sup>b</sup> Guo-Dong Li,<sup>b</sup> and Jie-Sheng Chen<sup>\*a</sup>

*School of Chemistry and Chemical Engineering, Shanghai Jiao Tong University, Shanghai 200240, P. R. China, and State Key Laboratory of Inorganic Synthesis and Preparative Chemistry, College of Chemistry, Jilin University, Changchun 130012, P. R. China*

#### Synthesis of SAPO-CHA

The precursor material SAPO-CHA was synthesized from a hydrothermal reaction system in which fumed silica, aluminum hydroxide hydrate (62 wt% Al<sub>2</sub>O<sub>3</sub>), phosphoric acid (85 %), cyclohexylamine (C<sub>6</sub>H<sub>11</sub>NH<sub>2</sub>) and hydrofluoric acid (40 %) were used as the reactants. A gel mixture with an empirical composition of 0.60SiO<sub>2</sub> : Al<sub>2</sub>O<sub>3</sub> : 0.80P<sub>2</sub>O<sub>5</sub> : 1.70C<sub>6</sub>H<sub>11</sub>NH<sub>2</sub> : 1.0HF : 80H<sub>2</sub>O was sealed in a Teflon-lined stainless steel autoclave and heated at 180 °C for 8 days. The solid product was filtered, washed, and dried at ambient temperature. Then the template was removed by calcining the as-synthesized materials at 560 °C in air for 24 hours.

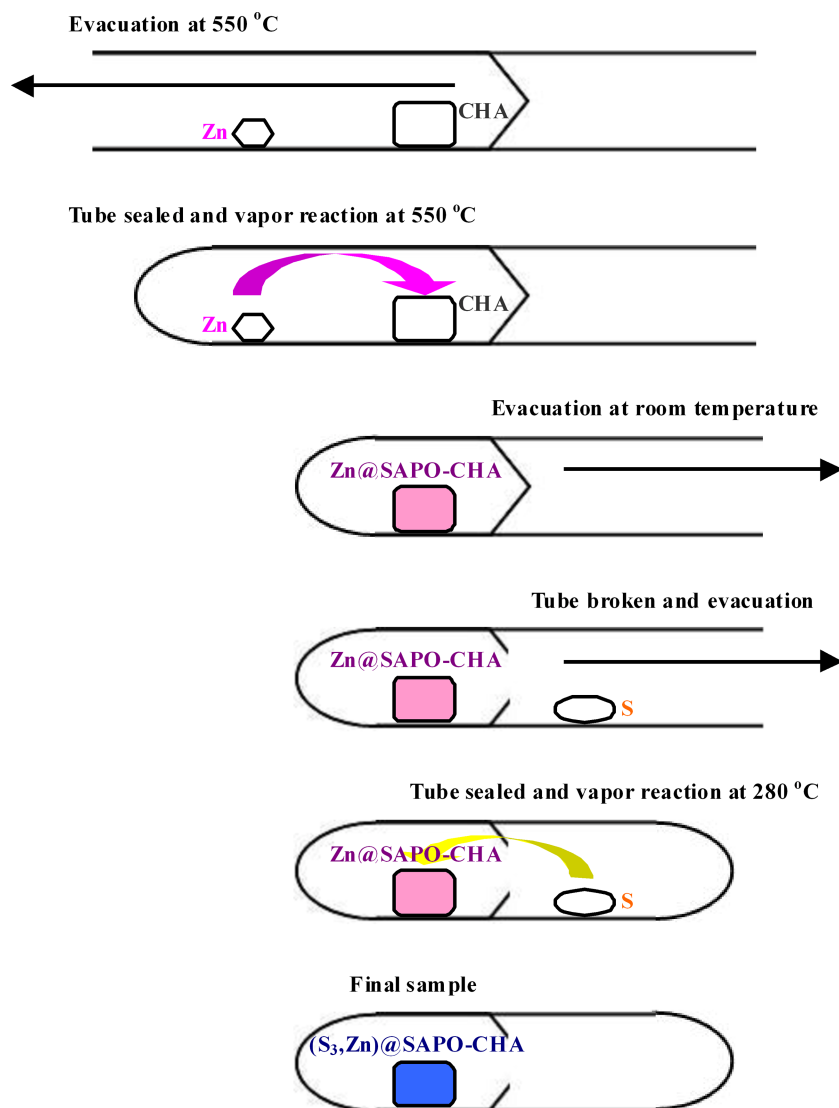

**Fig. S1** Schematic representation for the preparation procedure of  $(S_3,Zn)@SAPO-CHA$ .

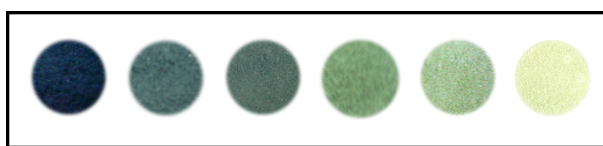

**Fig. S2** Photographs of the  $(S_3,Zn)@SAPO-CHA$  composite material after exposure to  $H_2O$  vapour (ca. 54 ppm) at different time intervals (0, 2, 4, 6, 10 and 15 minutes).

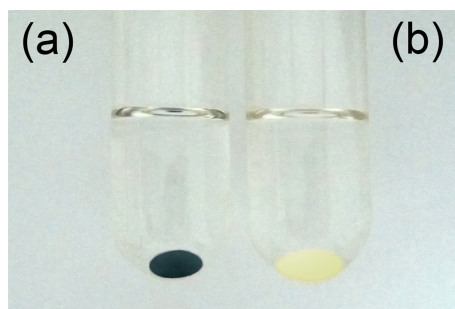

**Fig. S3** The photograph demonstrating the colors of  $(S_3,Zn)@SAPO-CHA$  in pure THF (a) and in a THF solution containing 500 ppm of  $H_2O$  (b).

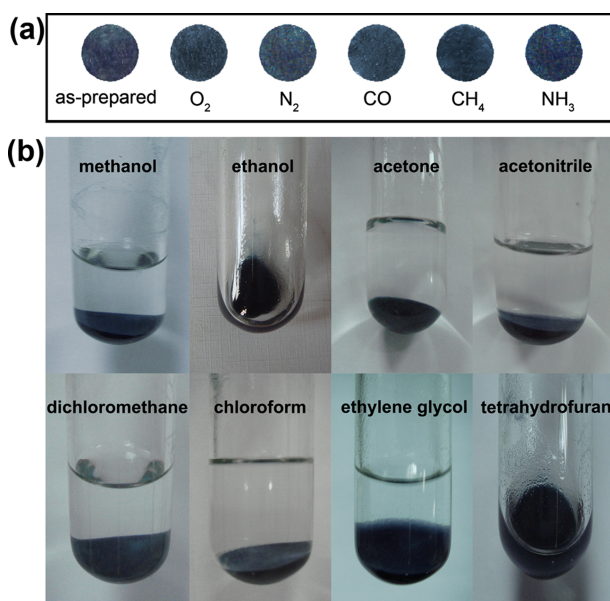

**Fig. S4** (a) Photographs of as-prepared  $(S_3,Zn)@SAPO-CHA$  and the samples after exposure to different gases ( $O_2$ ,  $N_2$ ,  $CO$ ,  $CH_4$  and  $NH_3$ ) for more than 30 minutes and (b) photographs of the  $(S_3,Zn)@SAPO-CHA$  in different organic solvents (methanol, ethanol, acetone, acetonitrile, dichloromethane, chloroform, ethylene glycol, and tetrahydrofuran).
